# Supplementary material for: Genomic characterisation of an endometrial pathogenic Escherichia coli strain reveals the acquisition of genetic elements associated with extra-intestinal pathogenicity
Source: PubMed Central journal article supplement (PMC4298941; doi:10.1186/1471-2164-15-1075), 2014-12-06
Supplement: 12864_2014_6792_MOESM1_ESM.pdf [file 12864_2014_6792_MOESM1_ESM.pdf]

Additional file 1. Comparison of the putative MS499 plasmid with related plasmids in ExPEC and *Salmonella* isolates

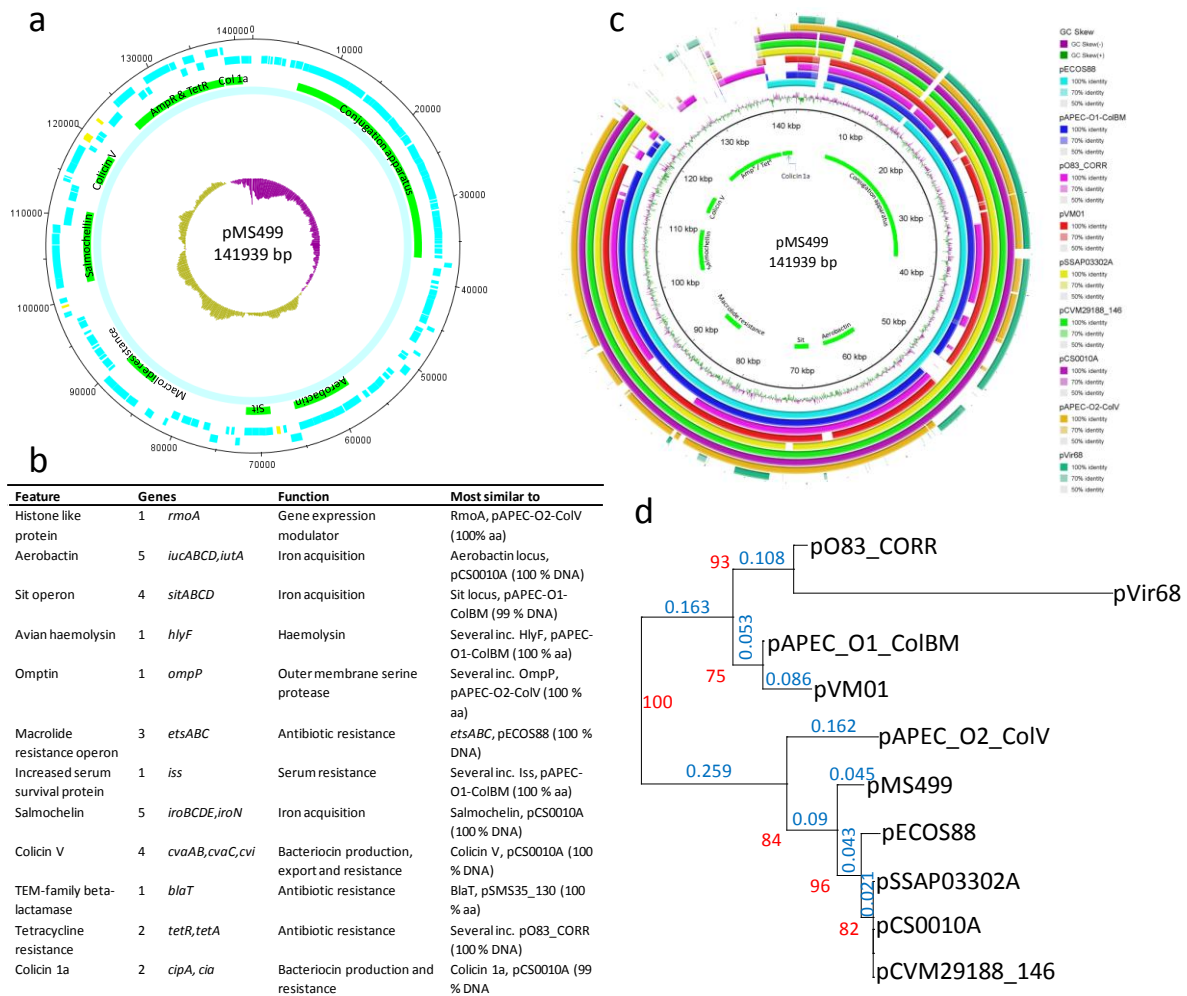

The circular MS499 plasmid is 142 kbp in length (a) and possesses several regions dedicated to putative virulence and fitness-related functions, including the Aerobactin and Salmochelin siderophore systems, the Sit iron/manganese transport system, resistance determinants for serum, macrolide, tetracycline and beta-lactam antibiotics, and two colicin loci (b). BRIG analysis shows large regions of pMS499 show striking homology to virulence plasmids found within ExPEC isolates including APEC (pAPEC-O1-ColBM, APEC-O2-CoIV), S88 (pECOS88), NRG 87C (pO83\_CORR), (pVM01), and several plasmids found within *Salmonella enterica* serovar Kentucky (pSSAP03302A, pCVM29188\_146 and pCS0010A). In contrast, the *E. coli* plasmid pVir68 shows high levels of

homology with regions encoding plasmid replication and conjugation functions, but not with regions encoding putative virulence and fitness related functions (c). A phylogenetic analysis of the evolutionary relationship between these plasmids suggests pMS499 is most closely related to pECOS88 and plasmids found in *S. enterica* than to similar plasmids found in other *E. coli* (d).

## Method

Homology between pMS499 and several other related plasmids (accession numbers listed in supplementary file 1 Table S2) was determined using the BLAST Ring Image Generator (BRIG) program [1]. Phylogenetic analysis of these plasmids was investigated by extracting the single nucleotide polymorphisms from the core genome of these plasmids using the PanSeq program [2] under the following settings: nucB: 200, nucC: 50, nucD: 0.12, nucG: 100, nucl: 20, fragmentationSize: 100, percentIdentityCutoff: 98. and constructing a maximum likelihood tree under the GTR substitution model using PhyML [3] launched within Seaview [4] with 1000 bootstrap runs.

1. Alikhan N-F, Petty N, Ben Zakour N, Beatson S: **BLAST Ring Image Generator (BRIG): simple prokaryote genome comparisons**. *BMC Genomics* 2011, **12**(1):402.
2. Laing C, Buchanan C, Taboada E, Zhang Y, Kropinski A, Villegas A, Thomas J, Gannon V: **Pan-genome sequence analysis using Panseq: an online tool for the rapid analysis of core and accessory genomic regions**. *BMC Bioinformatics* 2010, **11**(1):461.
3. Guindon S, Dufayard JF, Hordijk W, Lefort V, Gascuel O: **PhyML: fast and accurate phylogeny reconstruction by maximum likelihood**. *Infection Genetics and Evolution* 2009, **9**(3):384-385.
4. Gouy M, Guindon S, Gascuel O: **SeaView Version 4: A Multiplatform Graphical User Interface for Sequence Alignment and Phylogenetic Tree Building**. *Molecular Biology and Evolution* 2010, **27**(2):221-224.
